# Supplementary material for: Microscopic origin of pressure-induced phase-transitions in urea: a detailed investigation through first principles calculations
Source: Royal Society of Chemistry journal article supplement (doi:10.1039/c8cp04827d), 2018-11-30
Supplement: c8cp04827d1.pdf [file c8cp04827d1.pdf]

## Supporting Information

### Microscopic origin of pressure-induced phase-transitions in urea: A detailed investigation through first principles calculations

B. Moses Abraham, B. Adivaiah and G. Vaitheeswaran\*

*Advanced Centre of Research in High Energy Materials (ACRHEM), University of Hyderabad, Prof. C. R. Rao Road, Gachibowli, Hyderabad 500 046, Telangana, India.*

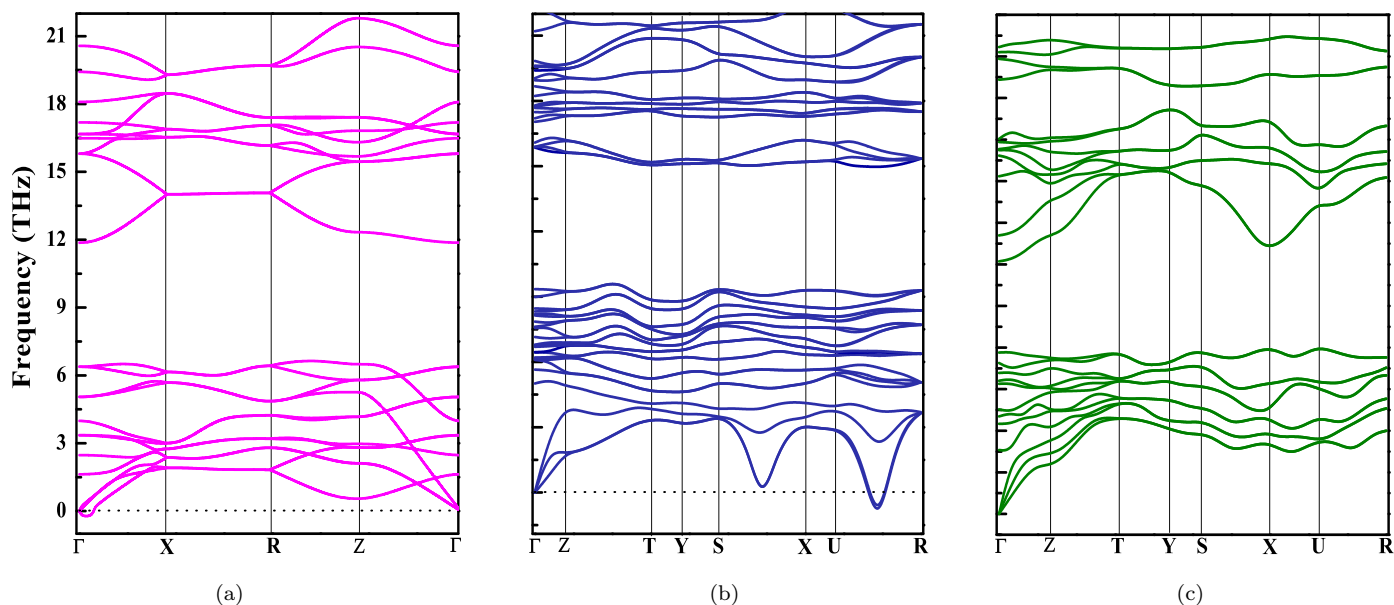

Figure 1: (Color online) Calculated phonon dispersion spectrum for (a) phase I (at 0.66 GPa), (b) phase III (at 3.09 GPa) and (c) phase IV (at 4 GPa) of urea polymorphs.

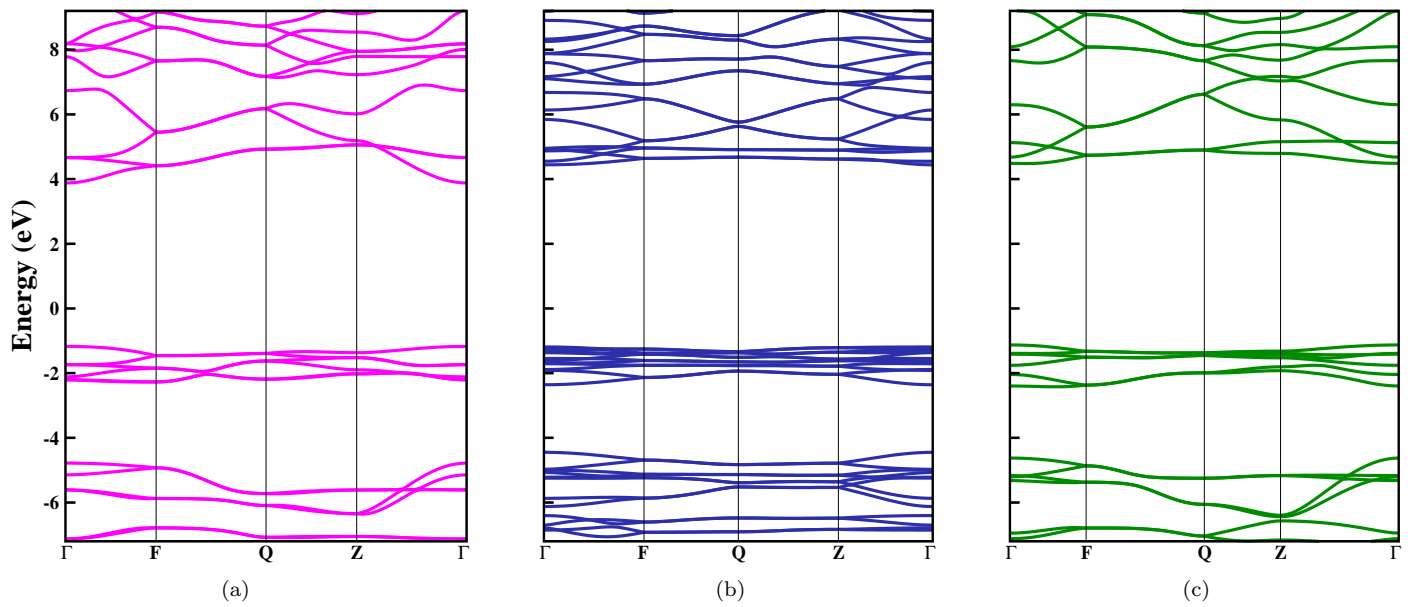

Figure 2: (Color online) Calculated band structures using PBE-GGA functional for (a) phase I, (b) phase III and (c) phase IV at 0, 0.66 and 3.09 GPa, respectively.

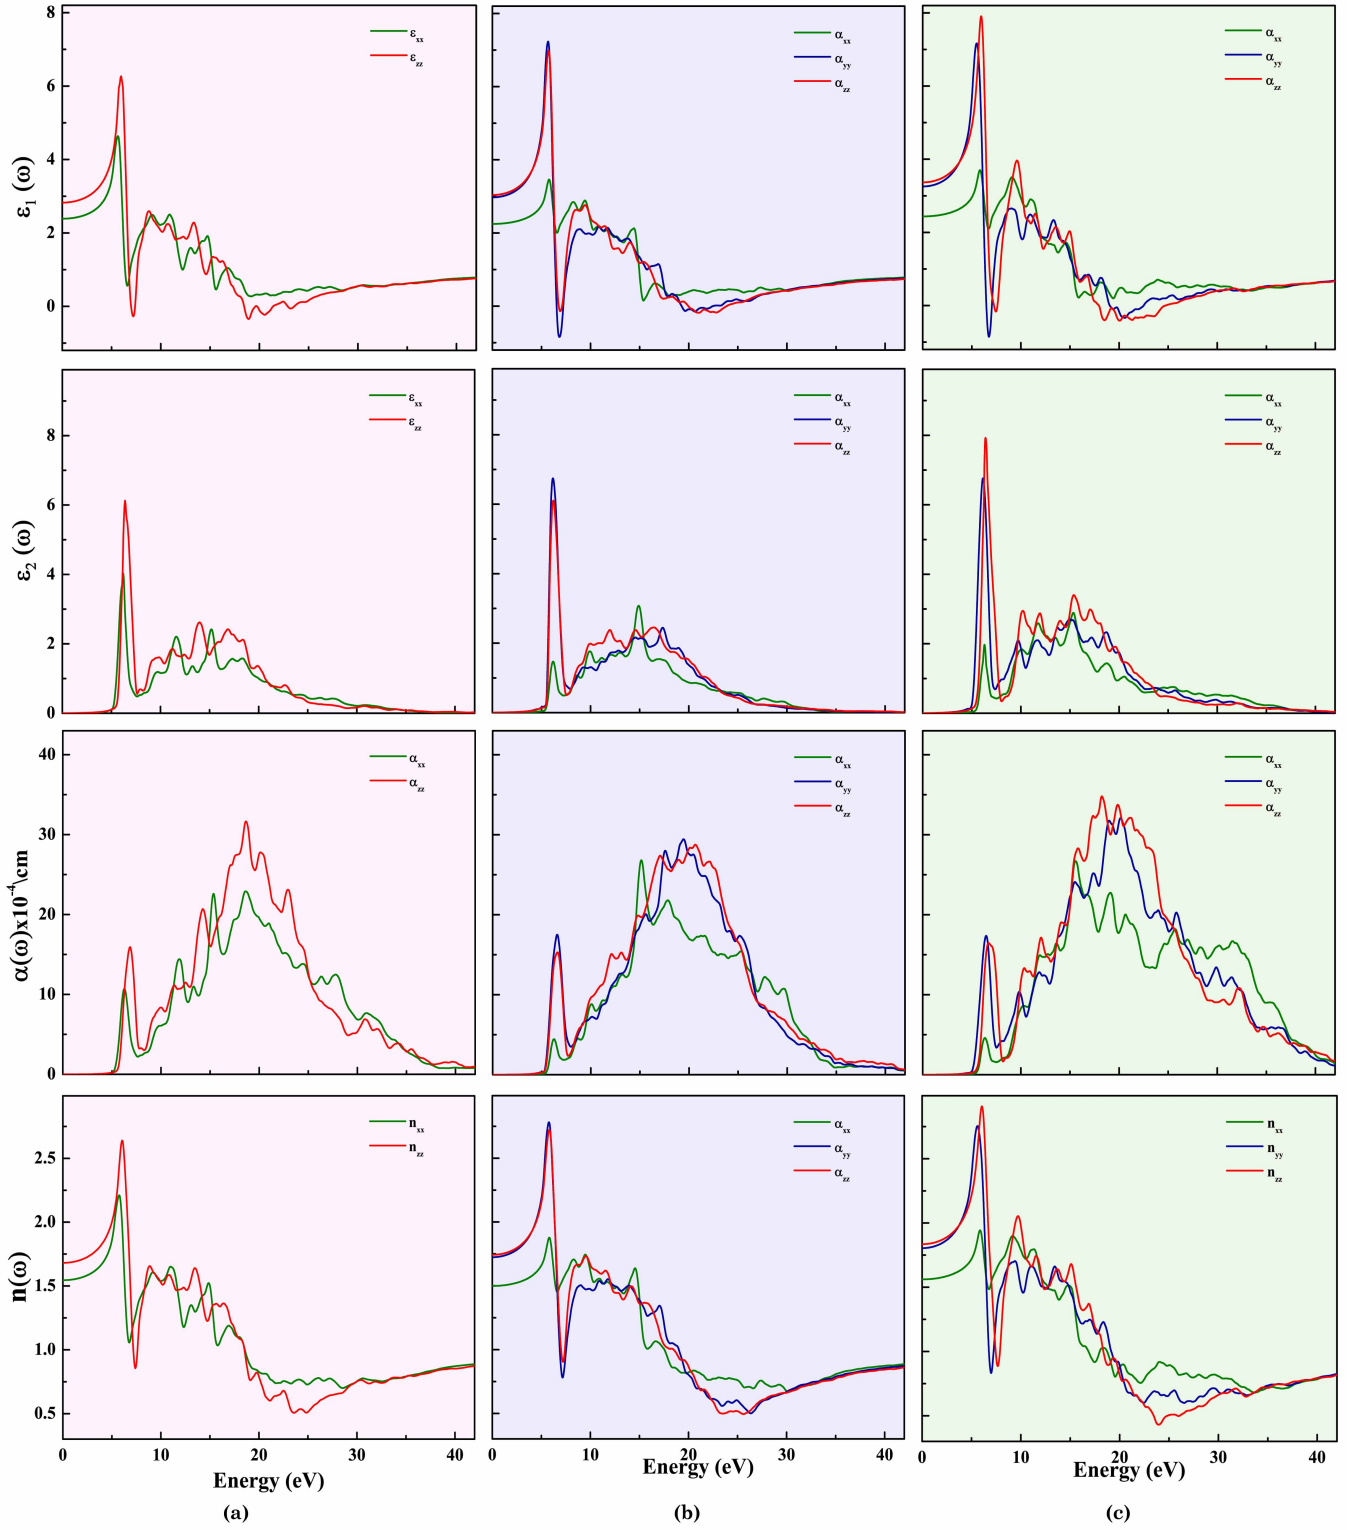

Figure 3: (Color online) Optical spectra (dielectric functions (real ( $\epsilon_1(\omega)$ ) and imaginary ( $\epsilon_2(\omega)$ ) parts), absorption spectra and refractive index of urea polymorphs as a function of photon energy calculated using PBE-GGA method for (a) phase I, (b) phase III and (c) phase IV at 0, 0.66 and 3.09 GPa, respectively.
